# Supplementary material
Source: Springer Nature journal article supplement (https://www.springermedizin.de/resource/supplementary/12990_2009_305_MOESM1_ESM.pdf/9612992)

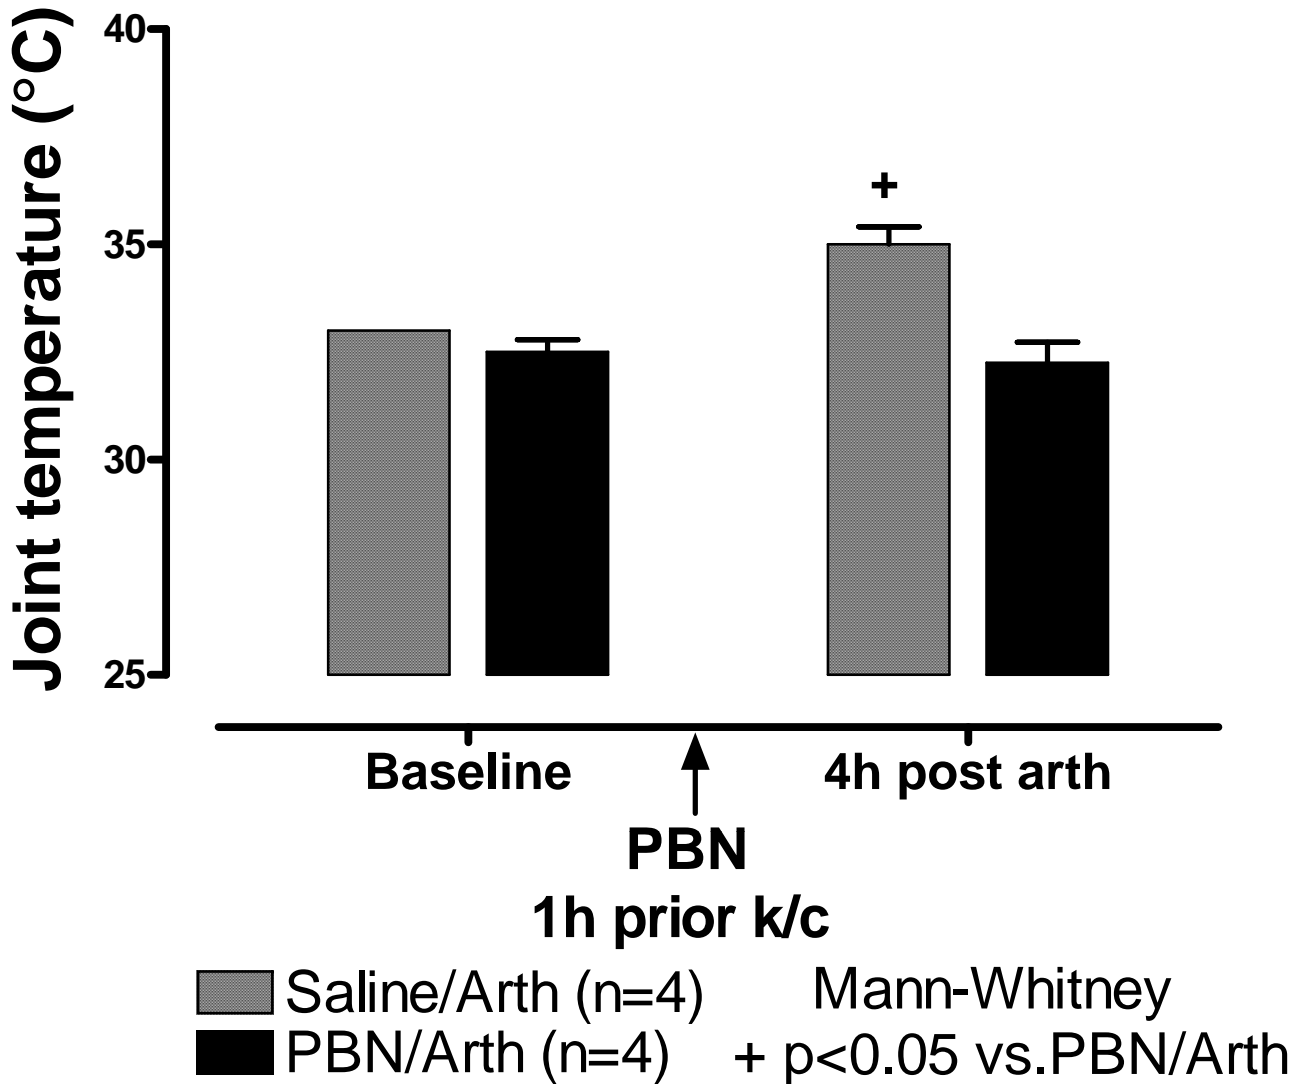

Supplement: MOESM1 [file 9612992]
